# Supplementary material for: Structure, enhancement and white luminescence of multifunctional Lu6O5F8:20%Yb3+,1%Er3+(Tm3+) nanoparticles via further doping with Li+ under different excitation sources
Source: Royal Society of Chemistry journal article supplement (doi:10.1039/c2nr33577h), 2013-01-01
Supplement: c2nr33577h.pdf [file c2nr33577h.pdf]

**Supporting information**

**Structure, Enhancement and white luminescence of multifunctional Lu<sub>6</sub>O<sub>5</sub>F<sub>8</sub>:20%Yb<sup>3+</sup>,1%Er<sup>3+</sup> (Tm<sup>3+</sup>) nanoparticles via further doping Li<sup>+</sup> under different excitation sources**

**Linna Guo, Yuhua Wang\*, Yanzhao Wang, Jia Zhang, Pengyu Dong and Wei Zeng**

*Department of Materials Science, School of Physical Science and Technology, Lanzhou University,  
Lanzhou, 730000, People's Republic of China*

\* Corresponding author. Tel.:+86 931 8912772.

Fax: +86 931 8913554.

E -mail address: wyh@lzu.edu.cn. (Y.H. Wang).

TG and DTA curves of precursor are shown in Fig. S1. Four major peaks were identified on the DTA curve. The first endothermic peak centered at 184 °C was mainly due to the evaporation of adsorbed water and the release of molecular water. The exothermic peak at 590 °C was attributed to the crystallization of ultimate phase. Inset of the figure shows the XRD patterns of precursor and after calcinated at 590 °C, revealing that the precursor is amorphous, but continued refinement of peak shapes and crystallite growth were observed after the precursor calcinated at 590 °C.

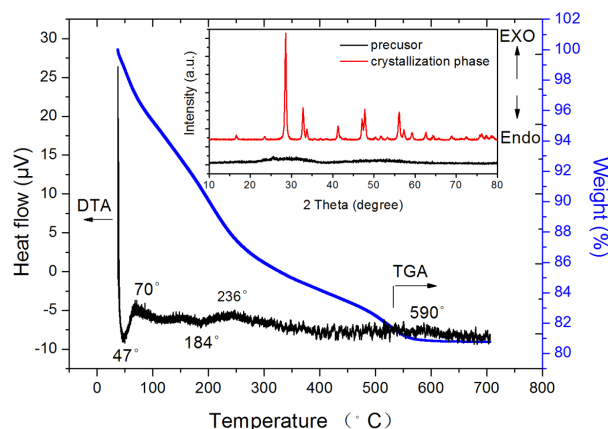

Fig. S1 TG-DTA curves of the precursor prepared by a coprecipitation method. Inset shows the XRD patterns of the precursor and after calcinated at 590 °C

Table 1. Parameters of the rietveld refinement of Lu<sub>6</sub>O<sub>5</sub>F<sub>8</sub>

|                                   |                                                                                                           |
|-----------------------------------|-----------------------------------------------------------------------------------------------------------|
| Formula                           | Lu <sub>6</sub> O <sub>5</sub> F <sub>8</sub>                                                             |
| Crystal system                    | orthorhombic                                                                                              |
| Lattice parameters/pm, °          | a=5.415<br>b=32.67<br>c=5.458<br>α=β=γ=90°                                                                |
| Formula units/cell                | 4                                                                                                         |
| Molar mass /g · mol <sup>-1</sup> | 1281.78                                                                                                   |
| Measured reflections              | 3500                                                                                                      |
| Observed reflections              | 382                                                                                                       |
| Radiation/pm                      | Cu-κα1 (λ=154.06 pm)                                                                                      |
| 2θ Range/°                        | 10≤2θ≤80                                                                                                  |
| Refinement                        | Retrieved refinement with Maud software                                                                   |
| Reliability factors               | sig= 1.2281519<br>Rw (%)=9.577053<br>Rwnb (% , no bkg)=7.7210436<br>Rb (%)=6.7005153<br>Rexp (%)=7.797938 |

The indexing of XRD patterns and the detailed PDF card information of Lu<sub>6</sub>O<sub>5</sub>F<sub>8</sub> are obtained through materials JADE software, as shown in the Table 2.

Lutecium Oxide Fluoride

Lu<sub>6</sub>O<sub>5</sub>F<sub>8</sub>

Radiation=CuKα1

Lambda=1.54060

Filter=

Calibration=

d-Cutoff= 17.7

I/I<sub>C</sub>(R/R)=

Orthorhombic-(Unknow), Pcmb (57)

Z=4

mp=

Cell=5.415\*32.67\*5.458

Density (c)=5.159

Density (m)= 5.61

Mwt=1281.79

Vol=965.56

Table 2 PDF card information of the Lu<sub>6</sub>O<sub>5</sub>F<sub>8</sub> host

| No. | 2Theta | d(Å)    | I(f)     | h | k  | l | 1/(2d)   | 2pi/d    |
|-----|--------|---------|----------|---|----|---|----------|----------|
| 1   | 5.411  | 16.3316 | 217113.4 | 0 | 2  | 0 | 0.030615 | 0.384726 |
| 2   | 16.707 | 5.3064  | 11454970 | 1 | 0  | 0 | 0.094226 | 1.184077 |
| 3   | 17.574 | 5.0467  | 18034.93 | 1 | 2  | 0 | 0.099075 | 1.245009 |
| 4   | 19.955 | 4.4495  | 19917.2  | 1 | 4  | 0 | 0.112372 | 1.412110 |
| 5   | 23.54  | 3.7795  | 5622493  | 1 | 1  | 1 | 0.132293 | 1.662438 |
| 6   | 24.787 | 3.592   | 109324.8 | 1 | 3  | 1 | 0.139198 | 1.749216 |
| 7   | 25.832 | 3.449   | 59941.71 | 1 | 4  | 1 | 0.14497  | 1.821741 |
| 8   | 27.121 | 3.2879  | 55884.08 | 1 | 5  | 1 | 0.152073 | 1.911003 |
| 9   | 27.304 | 3.2663  | 69109.86 | 0 | 10 | 0 | 0.153078 | 1.923640 |
| 10  | 28.623 | 3.1187  | 2.33E+08 | 1 | 6  | 1 | 0.160323 | 2.014681 |
| 11  | 30.31  | 2.9489  | 36398.45 | 1 | 7  | 1 | 0.169555 | 2.130688 |
| 12  | 32.157 | 2.7836  | 26945.22 | 1 | 8  | 1 | 0.179624 | 2.257216 |
| 13  | 32.812 | 2.7295  | 33644508 | 0 | 0  | 2 | 0.183184 | 2.301955 |
| 14  | 32.906 | 2.7219  | 37003710 | 0 | 12 | 0 | 0.183695 | 2.308382 |
| 15  | 32.929 | 2.7201  | 53044.95 | 0 | 1  | 2 | 0.183817 | 2.309910 |
| 16  | 33.28  | 2.6922  | 48957.6  | 0 | 2  | 2 | 0.185722 | 2.333848 |
| 17  | 33.784 | 2.6532  | 22107753 | 2 | 0  | 0 | 0.188452 | 2.368154 |
| 18  | 33.857 | 2.6476  | 53487.31 | 0 | 3  | 2 | 0.18885  | 2.373163 |
| 19  | 34.142 | 2.6262  | 67024.39 | 1 | 9  | 1 | 0.190389 | 2.392501 |
| 20  | 34.24  | 2.6189  | 67136.1  | 2 | 2  | 0 | 0.19092  | 2.399170 |
| 21  | 35.649 | 2.5185  | 2835437  | 0 | 5  | 2 | 0.198531 | 2.494813 |
| 22  | 37.038 | 2.4273  | 1835887  | 1 | 0  | 2 | 0.20599  | 2.588549 |
| 23  | 37.123 | 2.4219  | 2074414  | 1 | 12 | 0 | 0.206449 | 2.594321 |
| 24  | 37.46  | 2.4009  | 104197.2 | 1 | 2  | 2 | 0.208255 | 2.617012 |
| 25  | 37.801 | 2.38    | 68204.32 | 2 | 1  | 1 | 0.210084 | 2.639994 |
| 26  | 37.981 | 2.3691  | 19504.72 | 1 | 3  | 2 | 0.211051 | 2.652140 |
| 27  | 38.113 | 2.3612  | 28004.79 | 2 | 2  | 1 | 0.211757 | 2.661014 |
| 28  | 38.2   | 2.3561  | 651561   | 0 | 7  | 2 | 0.212215 | 2.666774 |
| 29  | 38.456 | 2.3409  | 1316604  | 1 | 11 | 1 | 0.213593 | 2.684090 |

|    |        |        |          |   |    |   |          |          |
|----|--------|--------|----------|---|----|---|----------|----------|
| 30 | 38.59  | 2.3331 | 866818.3 | 0 | 14 | 0 | 0.214307 | 2.693063 |
| 31 | 39.611 | 2.2753 | 132101.9 | 1 | 5  | 2 | 0.219751 | 2.761476 |
| 32 | 41.31  | 2.1855 | 27018081 | 2 | 6  | 1 | 0.228781 | 2.874942 |
| 33 | 41.392 | 2.1814 | 116317.5 | 0 | 9  | 2 | 0.229211 | 2.880345 |
| 34 | 41.957 | 2.1533 | 2692609  | 1 | 7  | 2 | 0.232202 | 2.917933 |
| 35 | 42.319 | 2.1358 | 462531.3 | 1 | 14 | 0 | 0.234104 | 2.941842 |
| 36 | 43.147 | 2.0967 | 1765906  | 1 | 13 | 1 | 0.23847  | 2.996702 |
| 37 | 43.194 | 2.0945 | 82866.69 | 0 | 10 | 2 | 0.23872  | 2.999850 |
| 38 | 43.95  | 2.0602 | 341134.3 | 2 | 8  | 1 | 0.242695 | 3.049794 |
| 39 | 43.968 | 2.0594 | 33896.48 | 2 | 10 | 0 | 0.242789 | 3.050979 |
| 40 | 45.119 | 2.0095 | 31242.46 | 0 | 11 | 2 | 0.248818 | 3.126741 |
| 41 | 45.492 | 1.9939 | 20351.37 | 2 | 9  | 1 | 0.250765 | 3.151204 |
| 42 | 47.155 | 1.9274 | 40061860 | 0 | 12 | 2 | 0.259417 | 3.259928 |
| 43 | 47.81  | 1.9025 | 29650306 | 2 | 0  | 2 | 0.262812 | 3.302594 |
| 44 | 47.879 | 1.8999 | 32617040 | 2 | 12 | 0 | 0.263172 | 3.307114 |
| 45 | 47.896 | 1.8993 | 51661.59 | 2 | 1  | 2 | 0.263255 | 3.308158 |
| 46 | 48.153 | 1.8897 | 50420.71 | 2 | 2  | 2 | 0.264592 | 3.324964 |
| 47 | 48.58  | 1.8741 | 86962.7  | 2 | 3  | 2 | 0.266795 | 3.352641 |
| 48 | 48.971 | 1.8601 | 483852.5 | 2 | 11 | 1 | 0.268803 | 3.377875 |
| 49 | 49.295 | 1.8486 | 29308.82 | 0 | 13 | 2 | 0.270475 | 3.398889 |
| 50 | 49.929 | 1.8266 | 1723753  | 2 | 5  | 2 | 0.273733 | 3.439826 |
| 51 | 50.372 | 1.8116 | 4752777  | 1 | 12 | 2 | 0.275999 | 3.468307 |
| 52 | 50.752 | 1.7989 | 110173.1 | 1 | 16 | 1 | 0.277948 | 3.492793 |
| 53 | 51.679 | 1.7688 | 5593177  | 3 | 0  | 0 | 0.282678 | 3.552230 |
| 54 | 51.903 | 1.7617 | 3140201  | 2 | 7  | 2 | 0.283817 | 3.566547 |
| 55 | 52.21  | 1.752  | 31173.13 | 2 | 14 | 0 | 0.285388 | 3.586293 |
| 56 | 52.918 | 1.7303 | 92063.98 | 2 | 13 | 1 | 0.288967 | 3.631269 |
| 57 | 53.215 | 1.7213 | 24265.62 | 1 | 0  | 3 | 0.290478 | 3.650256 |
| 58 | 53.295 | 1.7189 | 5361706  | 1 | 1  | 3 | 0.290884 | 3.655352 |
| 59 | 53.859 | 1.7022 | 56187.53 | 0 | 15 | 2 | 0.293738 | 3.691214 |
| 60 | 53.929 | 1.7002 | 74906.31 | 1 | 3  | 3 | 0.294083 | 3.695557 |
| 61 | 54.455 | 1.685  | 34749.95 | 2 | 9  | 2 | 0.296736 | 3.728893 |
| 62 | 54.48  | 1.6843 | 100189.5 | 1 | 4  | 3 | 0.296859 | 3.730443 |
| 63 | 54.559 | 1.682  | 35158.26 | 1 | 14 | 2 | 0.297265 | 3.735544 |
| 64 | 54.615 | 1.6804 | 182521.9 | 3 | 1  | 1 | 0.297548 | 3.739101 |
| 65 | 55.183 | 1.6645 | 55029.41 | 1 | 5  | 3 | 0.300391 | 3.774818 |
| 66 | 55.932 | 1.644  | 23259.75 | 2 | 10 | 2 | 0.304136 | 3.821889 |
| 67 | 56.034 | 1.6412 | 33483231 | 1 | 6  | 3 | 0.304655 | 3.828409 |
| 68 | 56.158 | 1.6379 | 38754818 | 1 | 18 | 1 | 0.305269 | 3.836123 |
| 69 | 56.273 | 1.6348 | 15009.32 | 0 | 16 | 2 | 0.305848 | 3.843397 |
| 70 | 57.029 | 1.6149 | 60943.95 | 1 | 7  | 3 | 0.309617 | 3.890758 |
| 71 | 57.278 | 1.6085 | 109143.6 | 2 | 15 | 1 | 0.310849 | 3.906239 |
| 72 | 57.312 | 1.6076 | 23570414 | 3 | 6  | 1 | 0.311023 | 3.908426 |

|     |        |        |          |   |    |   |          |          |
|-----|--------|--------|----------|---|----|---|----------|----------|
| 73  | 57.535 | 1.6019 | 15092.98 | 2 | 11 | 2 | 0.312129 | 3.922333 |
| 74  | 58.771 | 1.5711 | 821421.9 | 0 | 17 | 2 | 0.318248 | 3.999227 |
| 75  | 59.135 | 1.5623 | 28352.57 | 1 | 16 | 2 | 0.320041 | 4.021753 |
| 76  | 59.259 | 1.5594 | 20252207 | 2 | 12 | 2 | 0.320636 | 4.029233 |
| 77  | 59.411 | 1.5557 | 158253.1 | 3 | 8  | 1 | 0.321399 | 4.038816 |
| 78  | 59.432 | 1.5552 | 120723.3 | 1 | 9  | 3 | 0.321502 | 4.040114 |
| 79  | 61.559 | 1.5065 | 74890.7  | 1 | 17 | 2 | 0.331895 | 4.170717 |
| 80  | 61.821 | 1.5008 | 55809.22 | 1 | 20 | 1 | 0.333156 | 4.186557 |
| 81  | 61.898 | 1.4991 | 491583   | 2 | 1  | 3 | 0.333533 | 4.191305 |
| 82  | 62.355 | 1.4892 | 2286221  | 1 | 11 | 3 | 0.335751 | 4.219168 |
| 83  | 62.475 | 1.4866 | 48678.29 | 2 | 3  | 3 | 0.336338 | 4.226547 |
| 84  | 62.565 | 1.4847 | 23504.26 | 0 | 22 | 0 | 0.336768 | 4.231956 |
| 85  | 62.579 | 1.4844 | 7034410  | 3 | 0  | 2 | 0.336836 | 4.232811 |
| 86  | 62.637 | 1.4832 | 7357798  | 3 | 12 | 0 | 0.337109 | 4.236236 |
| 87  | 63.05  | 1.4744 | 57564.5  | 2 | 14 | 2 | 0.339121 | 4.261520 |
| 88  | 63.225 | 1.4708 | 27003.22 | 3 | 3  | 2 | 0.339951 | 4.271951 |
| 89  | 63.553 | 1.464  | 123987.4 | 3 | 11 | 1 | 0.34153  | 4.291793 |
| 90  | 63.724 | 1.4604 | 23263.99 | 3 | 4  | 2 | 0.342372 | 4.302373 |
| 91  | 64     | 1.4548 | 18541.3  | 1 | 12 | 3 | 0.34369  | 4.318934 |
| 92  | 64.008 | 1.4546 | 724573   | 0 | 19 | 2 | 0.343737 | 4.319528 |
| 93  | 64.363 | 1.4475 | 821391.8 | 3 | 5  | 2 | 0.345423 | 4.340715 |
| 94  | 64.402 | 1.4467 | 4370815  | 2 | 6  | 3 | 0.345614 | 4.343116 |
| 95  | 64.516 | 1.4444 | 5805280  | 2 | 18 | 1 | 0.346164 | 4.350031 |
| 96  | 65.108 | 1.4327 | 24575.69 | 2 | 15 | 2 | 0.348991 | 4.385555 |
| 97  | 65.763 | 1.42   | 2549964  | 1 | 13 | 3 | 0.352113 | 4.424778 |
| 98  | 66.051 | 1.4145 | 322400.3 | 3 | 7  | 2 | 0.353482 | 4.441983 |
| 99  | 66.316 | 1.4095 | 50002.66 | 3 | 14 | 0 | 0.354736 | 4.457741 |
| 100 | 66.368 | 1.4085 | 20374.93 | 2 | 8  | 3 | 0.354988 | 4.460905 |
| 101 | 66.67  | 1.4029 | 19866.77 | 1 | 19 | 2 | 0.356405 | 4.478712 |
| 102 | 68.788 | 1.3648 | 3769610  | 0 | 0  | 4 | 0.366354 | 4.603741 |
| 103 | 68.856 | 1.3636 | 22185.18 | 0 | 1  | 4 | 0.366676 | 4.607792 |
| 104 | 69.008 | 1.361  | 6315572  | 0 | 24 | 0 | 0.367377 | 4.616595 |
| 105 | 69.062 | 1.36   | 33308.16 | 0 | 2  | 4 | 0.367647 | 4.619989 |
| 106 | 69.403 | 1.3542 | 65179.05 | 0 | 3  | 4 | 0.369222 | 4.639776 |
| 107 | 69.537 | 1.3519 | 565257.9 | 2 | 17 | 2 | 0.36985  | 4.647670 |
| 108 | 69.567 | 1.3514 | 123937.6 | 0 | 21 | 2 | 0.369987 | 4.649390 |
| 109 | 69.782 | 1.3477 | 85366.13 | 2 | 20 | 1 | 0.371002 | 4.662154 |
| 110 | 70.284 | 1.3393 | 286693.2 | 2 | 11 | 3 | 0.373329 | 4.691395 |
| 111 | 70.437 | 1.3368 | 20545.77 | 3 | 16 | 0 | 0.374028 | 4.700169 |
| 112 | 70.49  | 1.3359 | 1351564  | 0 | 5  | 4 | 0.37428  | 4.703335 |
| 113 | 70.762 | 1.3315 | 53880.93 | 3 | 15 | 1 | 0.375516 | 4.718877 |
| 114 | 70.822 | 1.3305 | 149333.6 | 1 | 23 | 1 | 0.375799 | 4.722424 |
| 115 | 71.061 | 1.3266 | 1773158  | 4 | 0  | 0 | 0.376903 | 4.736307 |

|     |        |        |          |   |    |   |          |          |
|-----|--------|--------|----------|---|----|---|----------|----------|
| 116 | 71.234 | 1.3238 | 21719.01 | 0 | 6  | 4 | 0.377701 | 4.746325 |
| 117 | 71.331 | 1.3222 | 21968.33 | 4 | 2  | 0 | 0.378158 | 4.752069 |
| 118 | 71.361 | 1.3218 | 1100582  | 1 | 0  | 4 | 0.378272 | 4.753507 |
| 119 | 71.577 | 1.3183 | 990266.1 | 1 | 24 | 0 | 0.379276 | 4.766127 |
| 120 | 71.725 | 1.3159 | 76391.81 | 1 | 16 | 3 | 0.379968 | 4.774820 |
| 121 | 71.966 | 1.3121 | 15894.14 | 1 | 3  | 4 | 0.381069 | 4.788648 |
| 122 | 72.108 | 1.3099 | 1618130  | 0 | 7  | 4 | 0.381709 | 4.796691 |
| 123 | 72.128 | 1.3096 | 108510.5 | 1 | 21 | 2 | 0.381796 | 4.797790 |
| 124 | 72.47  | 1.3042 | 38716.81 | 0 | 22 | 2 | 0.383377 | 4.817655 |
| 125 | 72.537 | 1.3032 | 7087468  | 3 | 12 | 2 | 0.383671 | 4.821352 |
| 126 | 72.845 | 1.2984 | 18249.03 | 3 | 16 | 1 | 0.385089 | 4.839175 |
| 127 | 73.029 | 1.2956 | 22911.18 | 2 | 22 | 0 | 0.385922 | 4.849634 |
| 128 | 73.037 | 1.2955 | 401186.5 | 1 | 5  | 4 | 0.385951 | 4.850008 |
| 129 | 73.509 | 1.2884 | 184357.4 | 2 | 13 | 3 | 0.388078 | 4.876735 |
| 130 | 73.527 | 1.2881 | 470686.5 | 4 | 1  | 1 | 0.388169 | 4.877871 |
| 131 | 73.93  | 1.2821 | 36090.58 | 1 | 17 | 3 | 0.389985 | 4.900698 |
| 132 | 74.059 | 1.2801 | 29119.46 | 4 | 3  | 1 | 0.390594 | 4.908355 |
| 133 | 74.242 | 1.2774 | 77626.09 | 0 | 9  | 4 | 0.39142  | 4.918730 |
| 134 | 74.372 | 1.2755 | 569123.6 | 2 | 19 | 2 | 0.392003 | 4.926057 |
| 135 | 74.632 | 1.2717 | 69111.83 | 1 | 7  | 4 | 0.393174 | 4.940776 |
| 136 | 74.931 | 1.2674 | 421989.3 | 3 | 1  | 3 | 0.394508 | 4.957539 |
| 137 | 75.46  | 1.2598 | 25768.96 | 3 | 3  | 3 | 0.396888 | 4.987447 |
| 138 | 75.499 | 1.2593 | 24386.01 | 0 | 10 | 4 | 0.397046 | 4.989427 |
| 139 | 75.71  | 1.2563 | 16788.16 | 0 | 26 | 0 | 0.397994 | 5.001341 |
| 140 | 75.844 | 1.2544 | 10812979 | 4 | 6  | 1 | 0.398597 | 5.008917 |
| 141 | 76.242 | 1.2488 | 12480500 | 1 | 18 | 3 | 0.400384 | 5.031378 |
| 142 | 76.512 | 1.2451 | 16249.88 | 3 | 5  | 3 | 0.401574 | 5.046330 |
| 143 | 77.2   | 1.2357 | 131888.8 | 1 | 25 | 1 | 0.404629 | 5.084717 |
| 144 | 77.204 | 1.2357 | 57673.85 | 2 | 15 | 3 | 0.404629 | 5.084717 |
| 145 | 77.233 | 1.2353 | 6536255  | 3 | 6  | 3 | 0.40476  | 5.086364 |
| 146 | 77.338 | 1.2338 | 8317675  | 3 | 18 | 1 | 0.405252 | 5.092548 |
| 147 | 77.887 | 1.2265 | 17193.82 | 3 | 15 | 2 | 0.407664 | 5.122858 |
| 148 | 77.984 | 1.2252 | 15864.97 | 1 | 10 | 4 | 0.408097 | 5.128294 |
| 149 | 78.193 | 1.2225 | 21609.6  | 1 | 26 | 0 | 0.408998 | 5.139620 |
| 150 | 78.382 | 1.22   | 4535256  | 0 | 12 | 4 | 0.409836 | 5.150152 |
| 151 | 78.539 | 1.218  | 6085829  | 0 | 24 | 2 | 0.410509 | 5.158609 |
| 152 | 78.662 | 1.2164 | 22181.85 | 1 | 19 | 3 | 0.411049 | 5.165394 |
| 153 | 78.874 | 1.2136 | 3910315  | 2 | 0  | 4 | 0.411997 | 5.177312 |
| 154 | 78.939 | 1.2128 | 22520.13 | 2 | 1  | 4 | 0.412269 | 5.180727 |
| 155 | 79.06  | 1.2112 | 30110.32 | 3 | 8  | 3 | 0.412814 | 5.187570 |
| 156 | 79.083 | 1.2109 | 5130472  | 2 | 24 | 0 | 0.412916 | 5.188856 |
| 157 | 79.135 | 1.2103 | 18866.69 | 2 | 2  | 4 | 0.413121 | 5.191428 |
| 158 | 79.459 | 1.2062 | 64982.56 | 2 | 3  | 4 | 0.414525 | 5.209074 |

|     |        |        |          |   |    |   |          |          |
|-----|--------|--------|----------|---|----|---|----------|----------|
| 159 | 79.616 | 1.2042 | 15459.16 | 2 | 21 | 2 | 0.415213 | 5.217726 |
| 160 | 80.163 | 1.1973 | 20987.03 | 3 | 9  | 3 | 0.417606 | 5.247795 |
| 161 | 80.497 | 1.1932 | 1808660  | 2 | 5  | 4 | 0.419041 | 5.265827 |
| 162 | 80.502 | 1.1931 | 1605170  | 4 | 0  | 2 | 0.419076 | 5.266269 |
| 163 | 80.554 | 1.1925 | 1641486  | 4 | 12 | 0 | 0.419287 | 5.268918 |
| 164 | 80.842 | 1.189  | 295896.9 | 1 | 12 | 4 | 0.420521 | 5.284428 |
| 165 | 80.997 | 1.1871 | 450936.1 | 1 | 24 | 2 | 0.421195 | 5.292886 |
| 166 | 81.191 | 1.1848 | 24046.69 | 1 | 20 | 3 | 0.422012 | 5.303161 |
| 167 | 81.208 | 1.1845 | 24822.22 | 2 | 6  | 4 | 0.422119 | 5.304504 |
| 168 | 81.753 | 1.178  | 44673.36 | 0 | 14 | 4 | 0.424448 | 5.333774 |
| 169 | 82.037 | 1.1747 | 212621.6 | 3 | 17 | 2 | 0.425641 | 5.348757 |
| 170 | 82.047 | 1.1745 | 1610888  | 2 | 7  | 4 | 0.425713 | 5.349668 |
| 171 | 82.116 | 1.1737 | 262306.9 | 4 | 5  | 2 | 0.426003 | 5.353315 |
| 172 | 82.269 | 1.1719 | 73235.03 | 3 | 20 | 1 | 0.426658 | 5.361537 |
| 173 | 82.395 | 1.1705 | 54463.98 | 2 | 22 | 2 | 0.427168 | 5.367950 |
| 174 | 82.733 | 1.1665 | 24857.73 | 0 | 28 | 0 | 0.428633 | 5.386357 |
| 175 | 82.746 | 1.1664 | 781954.7 | 3 | 11 | 3 | 0.428669 | 5.386819 |
| 176 | 83.617 | 1.1564 | 2669590  | 2 | 18 | 3 | 0.432376 | 5.433401 |
| 177 | 83.619 | 1.1564 | 49394.39 | 0 | 15 | 4 | 0.432376 | 5.433401 |
| 178 | 83.66  | 1.156  | 228806.1 | 4 | 7  | 2 | 0.432526 | 5.435281 |
| 179 | 83.831 | 1.154  | 59256.72 | 1 | 21 | 3 | 0.433276 | 5.444701 |
| 180 | 84.19  | 1.15   | 39756.95 | 1 | 14 | 4 | 0.434783 | 5.463639 |
| 181 | 84.469 | 1.1469 | 95889.18 | 4 | 13 | 1 | 0.435958 | 5.478407 |
| 182 | 84.554 | 1.146  | 35692.35 | 2 | 25 | 1 | 0.4363   | 5.482710 |
| 183 | 84.993 | 1.1412 | 51976.57 | 0 | 26 | 2 | 0.438135 | 5.505771 |
| 184 | 85.165 | 1.1393 | 40856.63 | 1 | 28 | 0 | 0.438866 | 5.514952 |
| 185 | 85.323 | 1.1376 | 64580.7  | 2 | 10 | 4 | 0.439522 | 5.523194 |
| 186 | 85.528 | 1.1354 | 70065.3  | 2 | 26 | 0 | 0.440373 | 5.533896 |
| 187 | 85.825 | 1.1323 | 643197.7 | 3 | 13 | 3 | 0.441579 | 5.549046 |
| 188 | 86.198 | 1.1283 | 17816.97 | 4 | 14 | 1 | 0.443145 | 5.568719 |
| 189 | 86.657 | 1.1235 | 403004   | 3 | 19 | 2 | 0.445038 | 5.592510 |
| 190 | 86.667 | 1.1234 | 15610.15 | 2 | 11 | 4 | 0.445077 | 5.593008 |
| 191 | 86.927 | 1.1207 | 18305.12 | 4 | 10 | 2 | 0.44615  | 5.606483 |
| 192 | 87.455 | 1.1153 | 62718.18 | 1 | 28 | 1 | 0.44831  | 5.633628 |
| 193 | 87.654 | 1.1133 | 34793.62 | 3 | 22 | 1 | 0.449115 | 5.643749 |
| 194 | 87.717 | 1.1126 | 776895.8 | 0 | 17 | 4 | 0.449398 | 5.647299 |
| 195 | 88.136 | 1.1084 | 7134964  | 2 | 12 | 4 | 0.451101 | 5.668698 |
| 196 | 88.29  | 1.1069 | 9642959  | 2 | 24 | 2 | 0.451712 | 5.676380 |
| 197 | 89.404 | 1.096  | 54805.15 | 3 | 15 | 3 | 0.456204 | 5.732833 |
| 198 | 89.46  | 1.0954 | 892822.7 | 1 | 23 | 3 | 0.456454 | 5.735973 |
| 199 | 89.733 | 1.0928 | 25159.21 | 2 | 13 | 4 | 0.45754  | 5.749621 |
| 200 | 89.738 | 1.0928 | 3758405  | 4 | 12 | 2 | 0.45754  | 5.749621 |

The HRTEM image and the SAED pattern with lattice index of the host are investigated, as shown in the Fig. S2. HRTEM image (Fig. S2a) shows the clear and continuous lattice fringes which is arranged in one direction, indicating high crystallinity. The measured lattice spacing is 0.314 nm which is close to the (161) lattice plane (0.312 nm) of orthorhombic  $\text{Lu}_6\text{O}_5\text{F}_8$  structure. SAED pattern (Fig. S2b) taken from the edge of the nanoparticles exhibits clear diffraction rings corresponding to the specific (1 6 1), (0 0 2), (2 0 2), (1 6 3), (3 12 2) and (2 12 4) planes of the orthorhombic structure  $\text{Lu}_6\text{O}_5\text{F}_8$ . It is worthwhile noting that the lattice index calculated from the HRTEM image and SAED pattern agrees well with the XRD and Rietveld refinement data.

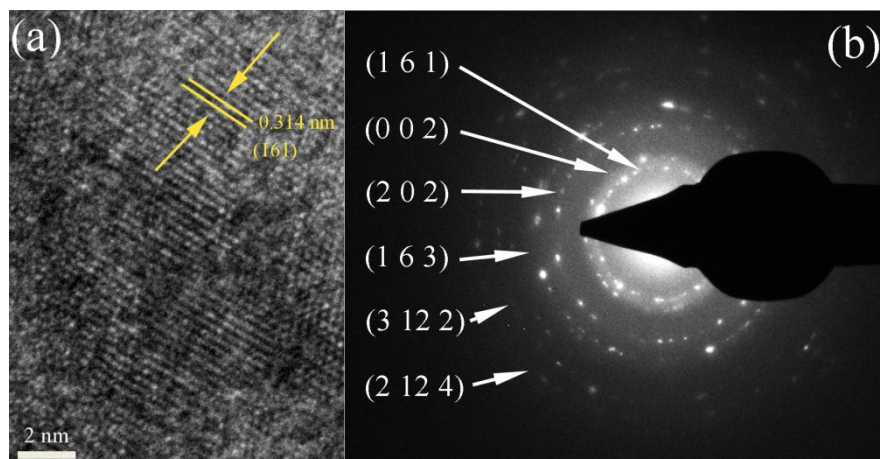

Fig. S2 HRTEM image (a) and SAED pattern (b) of  $\text{Lu}_6\text{O}_5\text{F}_8$  nanoparticles

Fig. S3 shows the upconversion emission spectra of the  $\text{Lu}_6\text{O}_5\text{F}_8:20\% \text{Yb}^{3+}, 1\% \text{Er}^{3+}, 3\% \text{Li}^+$  nanoparticles and  $\text{NaYF}_4:20\% \text{Yb}^{3+}, 2\% \text{Er}^{3+}$  nanocrystals as the commercial UC phosphor under the same measurement condition. It is found that the red emission intensity of  $\text{Lu}_6\text{O}_5\text{F}_8:20\% \text{Yb}^{3+}, 1\% \text{Er}^{3+}, 3\% \text{Li}^+$  is much stronger than that of the commercial phosphor, but the green emission intensity of  $\text{Lu}_6\text{O}_5\text{F}_8:20\% \text{Yb}^{3+}, 1\% \text{Er}^{3+}, 3\% \text{Li}^+$  is weaker than that of the commercial phosphor. On the whole, the intergrated emission intensity in  $\text{Lu}_6\text{O}_5\text{F}_8:20\% \text{Yb}^{3+}, 1\% \text{Er}^{3+}, 3\% \text{Li}^+$  is 5.5 times as strong as that of the commercial phosphor.

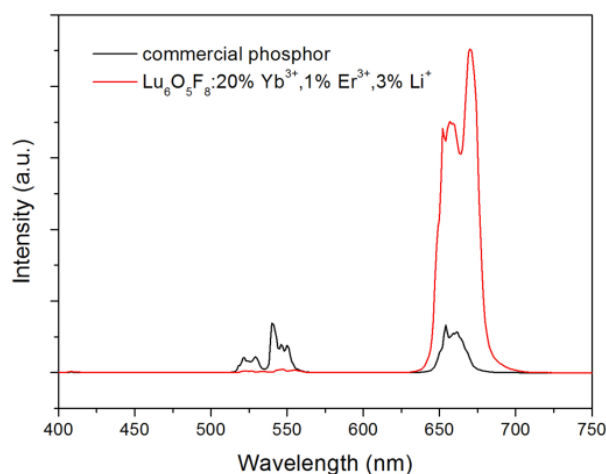

Fig. S3 The upconversion emission spectra of  $\text{Lu}_6\text{O}_5\text{F}_8:20\% \text{Yb}^{3+}, 1\% \text{Er}^{3+}, 3\% \text{Li}^+$  nanoparticles and the commercial phosphor



Diffuse reflectance spectra in the UV, visible and NIR regions were measured on a series of samples with different  $\text{Li}^+$  concentrations, as shown in Fig. S4. The sharp bands are assigned to the intraconfigurational f-f transitions from the  $^4\text{I}_{15/2}$  ground state to the  $^4\text{G}_{11/2}$ ,  $^2\text{H}_{11/2}$  and  $^4\text{F}_{9/2}$  excited states of  $\text{Er}^{3+}$  and  $^2\text{F}_{5/2} \rightarrow ^2\text{F}_{7/2}$  transition of  $\text{Yb}^{3+}$ , and all the peaks are labelled in the figure. The position and intensities of reflection peaks of  $\text{Er}^{3+}$  and  $\text{Yb}^{3+}$  are basically not affected by the  $\text{Li}^+$  doping, and no other peaks are observed. It is indicated that the  $\text{Li}^+$  ions cannot absorb 980 nm photons and cannot transfer its energy to  $\text{Er}^{3+}$ .

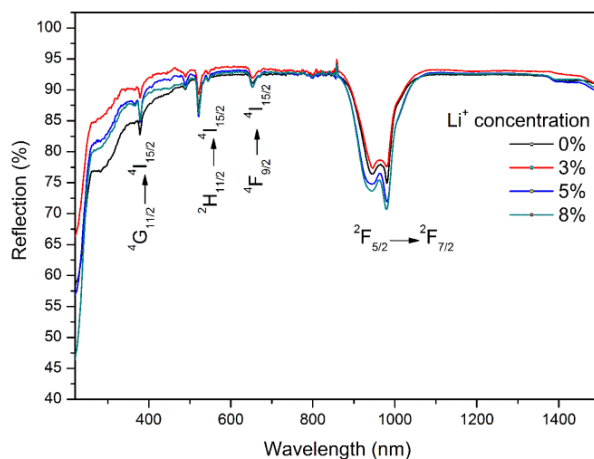

Fig. S4 Reflection spectra of  $\text{Lu}_6\text{O}_5\text{F}_8:20\% \text{Yb}^{3+}, 1\% \text{Er}^{3+}$  nanoparticles with different concentrations of  $\text{Li}^+$ .

To further understand the reasons for the red emission intensity of UC is more predominately than that of DC, the pump power dependence of UC emission intensity was performed, as exemplified in Fig. S5. It is well known that  $I_{\text{em}} \propto I_{\text{p}}^n$  exists in UC processes, where  $n$  denotes the number of NIR photons absorbed to generate one frequency upconverted photon. Fitting data points yielded approximately slopes were 1.67, 1.69 and 1.64 for 525, 553 and 658 nm emissions in  $\text{Lu}_6\text{O}_5\text{F}_8:20\% \text{Yb}^{3+}, 1\% \text{Er}^{3+}$  sample, when introducing 3%  $\text{Li}^+$ , which are changed slightly. These results indicate that the green and red emissions are two-photon processes in samples both with and without  $\text{Li}^+$  ions.

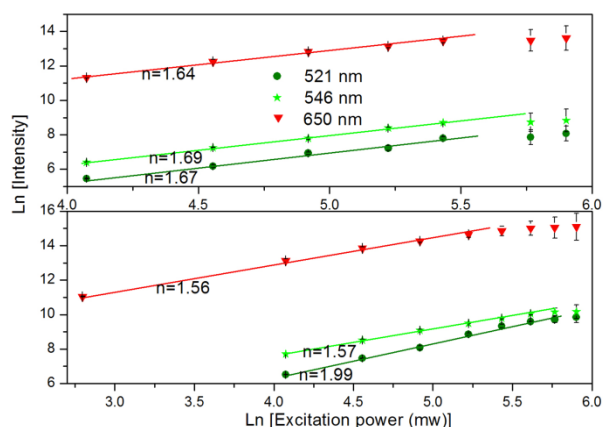

Fig. S5 Pump power dependence of the green and red UC emissions in  $\text{Lu}_6\text{O}_5\text{F}_8:20\% \text{Yb}^{3+}, 1\% \text{Er}^{3+}$  and  $\text{Lu}_6\text{O}_5\text{F}_8:20\% \text{Yb}^{3+}, 1\% \text{Er}^{3+}, 3\% \text{Li}^+$  nanoparticles, respectively
